# Supplementary material for: Caenorhabditis elegans respond to high-glucose diets through a network of stress-responsive transcription factors
Source: PubMed Central journal article supplement (PMC6039004; doi:10.1371/journal.pone.0199888), 2018-07-10
Supplement: pone.0199888.s003.pdf [file pone.0199888.s003.pdf]

**S2 Table. Survival data and statistics for lifespan experiments.** The effects of glucose-supplemented diets on the lifespan of wild-type, mutant or RNAi-treated animals.

| Treatment      | Strain (n)                   | Mean lifespan (days) | Changes in mean lifespan (%) <sup>Δ</sup> | Max. lifespan (days) | Changes in max lifespan (%) <sup>Δ</sup> | $\chi^2$           | P value    | Figure in text          |
|----------------|------------------------------|----------------------|-------------------------------------------|----------------------|------------------------------------------|--------------------|------------|-------------------------|
| Control        | N2 Bristol (110)             | 14.48                | -                                         | 23                   | -                                        | -                  | -          | Figure 7A               |
|                | N2 Bristol (110)             | 16.18                | -                                         | 26                   | -                                        | -                  | -          | Figure 7A               |
|                | N2 Bristol (110)             | 17.21                | -                                         | 25                   | -                                        | -                  | -          | Figure 7A               |
| 20 mM glucose  | N2 Bristol (110)             | 14.11                | -2.56 <sup>a</sup>                        | 17                   | -26.09 <sup>a</sup>                      | 0.23 <sup>a</sup>  | 0.628 (ns) | Figure 7A               |
|                | N2 Bristol (110)             | 16.21                | +0.19 <sup>a</sup>                        | 19                   | -26.92 <sup>a</sup>                      | 1.33 <sup>a</sup>  | 0.479 (ns) | Figure 7A               |
|                | N2 Bristol (110)             | 16.40                | -4.71 <sup>a</sup>                        | 20                   | -20.00 <sup>a</sup>                      | 1.19 <sup>a</sup>  | 0.316 (ns) | Figure 7A               |
| 40 mM glucose  | N2 Bristol (110)             | 10.03                | -30.73 <sup>a</sup>                       | 16                   | -30.43 <sup>a</sup>                      | 48.72 <sup>a</sup> | <0.0001    | Figure 7A               |
|                | N2 Bristol (110)             | 11.22                | -30.66 <sup>a</sup>                       | 15                   | -42.31 <sup>a</sup>                      | 52.65 <sup>a</sup> | <0.0001    | Figure 7A               |
|                | N2 Bristol (110)             | 13.23                | -23.13 <sup>a</sup>                       | 15                   | -40.00 <sup>a</sup>                      | 50.37 <sup>a</sup> | <0.0001    | Figure 7A               |
| 80 mM glucose  | N2 Bristol (110)             | 9.72                 | -32.87 <sup>a</sup>                       | 13                   | -43.48 <sup>a</sup>                      | 57.72 <sup>a</sup> | <0.0001    | Figure 7A               |
|                | N2 Bristol (110)             | 12.43                | -23.18 <sup>a</sup>                       | 13                   | -50.00 <sup>a</sup>                      | 65.96 <sup>a</sup> | <0.0001    | Figure 7A               |
|                | N2 Bristol (110)             | 11.80                | -31.44 <sup>a</sup>                       | 16                   | -36.00 <sup>a</sup>                      | 47.60 <sup>a</sup> | <0.0001    | Figure 7A               |
| 100 mM glucose | N2 Bristol (110)             | 9.25                 | -36.12 <sup>a</sup>                       | 11                   | -52.17 <sup>a</sup>                      | 71.63 <sup>a</sup> | <0.0001    | Figure 7A               |
|                | N2 Bristol (110)             | 10.02                | -38.07 <sup>a</sup>                       | 13                   | -50.00 <sup>a</sup>                      | 80.37 <sup>a</sup> | <0.0001    | Figure 7A               |
|                | N2 Bristol (110)             | 11.49                | -33.24 <sup>a</sup>                       | 15                   | -40.00 <sup>a</sup>                      | 60.47 <sup>a</sup> | <0.0001    | Figure 7A               |
| Control        | N2 Bristol (100)             | 14.43                | -                                         | 23                   | -                                        | -                  | -          | Figures 7D, 7E, and 7G, |
|                | N2 Bristol (120)             | 16.24                | -                                         | 26                   | -                                        | -                  | -          | Figures 7D, 7E, and 7G, |
|                | N2 Bristol (120)             | 17.21                | -                                         | 27                   | -                                        | -                  | -          | Figures 7D, 7E, and 7G, |
| 100 mM glucose | N2 Bristol (110)             | 9.79                 | -32.15 <sup>a</sup>                       | 11                   | -52.17 <sup>a</sup>                      | 39.14 <sup>a</sup> | <0.0001    | Figures 7D, 7E, and 7G, |
|                | N2 Bristol (120)             | 10.70                | -34.11 <sup>a</sup>                       | 16                   | -38.46 <sup>a</sup>                      | 86.79 <sup>a</sup> | <0.0001    | Figures 7D, 7E, and 7G, |
|                | N2 Bristol (120)             | 10.02                | -38.30 <sup>a</sup>                       | 13                   | -51.85 <sup>a</sup>                      | 56.69 <sup>a</sup> | <0.0001    | Figures 7D, 7E, and 7G, |
| Control        | <i>daf-16</i> (mgDf50) (110) | 10.95                | -24.11 <sup>a</sup>                       | 14                   | -39.13 <sup>a</sup>                      | 46.09 <sup>a</sup> | <0.0001    | Figure 7G               |
|                | <i>daf-16</i> (mgDf50) (110) | 11.03                | -32.08 <sup>a</sup>                       | 16                   | -38.46 <sup>a</sup>                      | 44.28 <sup>a</sup> | <0.0001    | Figure 7G               |
|                | <i>daf-16</i> (mgDf50) (110) | 11.45                | -33.47 <sup>a</sup>                       | 16                   | -40.74 <sup>a</sup>                      | 53.27 <sup>a</sup> | <0.0001    | Figure 7G               |

|                |                              |       |                     |    |                     |                                          |                          |                        |
|----------------|------------------------------|-------|---------------------|----|---------------------|------------------------------------------|--------------------------|------------------------|
| 100 mM glucose | <i>daf-16</i> (mgDf50) (110) | 9.91  | -31.32 <sup>a</sup> | 12 | -47.83 <sup>a</sup> | 26.69 <sup>a</sup><br>11.75 <sup>b</sup> | <0.0001<br>0.0018        | Figure 7G              |
|                | <i>daf-16</i> (mgDf50) (110) | 8.62  | -46.92 <sup>a</sup> | 13 | -50.00 <sup>a</sup> | 30.18 <sup>a</sup><br>13.27 <sup>b</sup> | <0.0001<br>0.0029        | Figure 7G              |
|                | <i>daf-16</i> (mgDf50) (110) | 10.2  | -40.73 <sup>a</sup> | 11 | -59.26 <sup>a</sup> | 37.64 <sup>a</sup><br>16.50 <sup>b</sup> | <0.0001<br>0.0003        | Figure 7G              |
| Control        | <i>daf-16</i> (mu86) (120)   | 11.85 | -17.88 <sup>a</sup> | 20 | -13.04 <sup>a</sup> | 51.35 <sup>a</sup>                       | <0.0001                  | Figure 7H              |
|                | <i>daf-16</i> (mu86) (120)   | 11.26 | -30.67 <sup>a</sup> | 20 | -23.08 <sup>a</sup> | 54.63 <sup>a</sup>                       | <0.0001                  | Figure 7H              |
| 100 mM glucose | <i>daf-16</i> (mu86) (120)   | 10.23 | -29.11 <sup>a</sup> | 16 | -30.43 <sup>a</sup> | 94.61 <sup>a</sup><br>13.04 <sup>b</sup> | <0.0001<br>0.0003        | Figure 7H              |
|                | <i>daf-16</i> (mu86) (120)   | 9.19  | -43.41 <sup>a</sup> | 15 | -42.30 <sup>a</sup> | 74.80 <sup>a</sup><br>17.26 <sup>b</sup> | <0.0001<br>0.0005        | Figure 7H              |
| Control        | <i>skn-1</i> (zu135) (110)   | 12.41 | -13.99 <sup>a</sup> | 18 | -21.74 <sup>a</sup> | 18.59 <sup>a</sup>                       | <0.0001                  | Figure 7E              |
|                | <i>skn-1</i> (zu135) (110)   | 12.23 | -24.69 <sup>a</sup> | 18 | -30.77 <sup>a</sup> | 19.78 <sup>a</sup>                       | <0.0001                  | Figure 7E              |
|                | <i>skn-1</i> (zu135) (110)   | 12.16 | +18.93 <sup>a</sup> | 19 | -20.83 <sup>a</sup> | 16.54 <sup>a</sup>                       | 0.0002                   | Figure 7E              |
| 100 mM glucose | <i>skn-1</i> (zu135) (110)   | 12.35 | -14.41 <sup>a</sup> | 18 | -21.74 <sup>a</sup> | 15.99 <sup>a</sup><br>0.01 <sup>b</sup>  | 0.0002<br>0.904 (ns)     | Figure 7E              |
|                | <i>skn-1</i> (zu135) (110)   | 12.40 | -23.65 <sup>a</sup> | 18 | -30.77 <sup>a</sup> | 17.21 <sup>a</sup><br>0.9 <sup>b</sup>   | 0.0001<br>0.183(ns)      | Figure 7E<br>Figure 7E |
|                | <i>skn-1</i> (zu135) (110)   | 11.70 | -27.96 <sup>a</sup> | 17 | -29.16 <sup>a</sup> | 16.47 <sup>a</sup><br>0.18 <sup>b</sup>  | 0.0002<br>0.234(ns)      | Figure 7E<br>Figure 7E |
| Control        | <i>cep-1</i> (gk138) (110)   | 13.79 | -4.44 <sup>a</sup>  | 20 | -13.04 <sup>a</sup> | 13.26 <sup>a</sup>                       | 0.0008                   | Figure 7D              |
|                | <i>cep-1</i> (gk138) (110)   | 14.02 | -13.67 <sup>a</sup> | 22 | -15.38 <sup>a</sup> | 16.47 <sup>a</sup>                       | 0.0003                   | Figure 7D              |
|                | <i>cep-1</i> (gk138) (110)   | 14.22 | -17.37 <sup>a</sup> | 21 | -22.22 <sup>a</sup> | 18.97 <sup>a</sup>                       | 0.0001                   | Figure 7D              |
| 100 mM glucose | <i>cep-1</i> (gk138) (110)   | 12.49 | -13.44 <sup>a</sup> | 20 | -13.04 <sup>a</sup> | 3.54 <sup>a</sup><br>4.97 <sup>b</sup>   | 0.179 (ns)<br>0.078 (ns) | Figure 7D              |
|                | <i>cep-1</i> (gk138) (110)   | 13.06 | -19.58 <sup>a</sup> | 19 | -26.92 <sup>a</sup> | 6.48 <sup>a</sup><br>2.68 <sup>b</sup>   | 0.0053(ns)<br>0.086(ns)  | Figure 7D<br>Figure 7D |
|                | <i>cep-1</i> (gk138) (110)   | 12.7  | -26.21 <sup>a</sup> | 21 | -22.22 <sup>a</sup> | 4.16 <sup>a</sup><br>1.27 <sup>b</sup>   | 0.093 (ns)<br>0.296(ns)  | Figure 7D<br>Figure 7D |
| Control (RNAi) | N2; <i>pL4440</i> (110)      | 13.07 | -                   | 22 | -                   | -                                        | -                        | Figures 7B, 7C, and 7F |
|                | N2; <i>pL4440</i> (110)      | 14.28 | -                   | 20 | -                   | -                                        | -                        | Figures 7B, 7C, and 7F |

|                       |                         |       |                     |    |                     |                                         |                          |                        |
|-----------------------|-------------------------|-------|---------------------|----|---------------------|-----------------------------------------|--------------------------|------------------------|
|                       | N2; <i>pL4440</i> (110) | 13.29 | -                   | 20 | -                   | -                                       | -                        | Figures 7B, 7C, and 7F |
| 100 mM glucose (RNAi) | N2; <i>pL4440</i> (110) | 9.39  | -28.16 <sup>c</sup> | 12 | -45.45 <sup>c</sup> | 39.05 <sup>c</sup>                      | <0.0001                  | Figures 7B, 7C, and 7F |
|                       | N2; <i>pL4440</i> (110) | 10.23 | -28.36 <sup>c</sup> | 13 | -35.00 <sup>c</sup> | 44.05 <sup>c</sup>                      | <0.0001                  | Figures 7B, 7C, and 7F |
|                       | N2; <i>pL4440</i> (110) | 9.01  | -36.90 <sup>c</sup> | 12 | -40.00 <sup>c</sup> | 38.27 <sup>c</sup>                      | <0.0001                  | Figures 7B, 7C, and 7F |
| Control (RNAi)        | N2; <i>sbp-1</i> (110)  | 11.72 | -10.33 <sup>c</sup> | 19 | -13.64 <sup>c</sup> | 1.65 <sup>c</sup>                       | 0.199 (ns)               | Figure 7F              |
|                       | N2; <i>sbp-1</i> (110)  | 12.01 | -15.90 <sup>c</sup> | 19 | -5.00 <sup>c</sup>  | 0.34 <sup>c</sup>                       | 0.478 (ns)               | Figure 7F              |
|                       | N2; <i>sbp-1</i> (110)  | 11.19 | -21.64 <sup>c</sup> | 18 | -10.00 <sup>c</sup> | 1.89 <sup>c</sup>                       | 0.290 (ns)               | Figure 7F              |
| 100 mM glucose (RNAi) | N2; <i>sbp-1</i> (110)  | 9.42  | -27.93 <sup>c</sup> | 15 | -31.82 <sup>c</sup> | 10.31 <sup>c</sup><br>0.38 <sup>d</sup> | 0.004<br>0.900(ns)       | Figure 7F              |
|                       | N2; <i>sbp-1</i> (110)  | 10.13 | -29.06 <sup>c</sup> | 13 | -35.00 <sup>c</sup> | 16.70 <sup>c</sup><br>0.47 <sup>d</sup> | 0.004<br>0.123 (ns)      | Figure 7F<br>Figure 7F |
|                       | N2; <i>sbp-1</i> (110)  | 10.46 | -26.75 <sup>c</sup> | 15 | -35.00 <sup>c</sup> | 18.27 <sup>c</sup><br>0.44 <sup>d</sup> | 0.002<br>0.110(ns)       | Figure 7F<br>Figure 7F |
|                       | N2; <i>sbp-1</i> (110)  | 10.46 | -26.75 <sup>c</sup> | 15 | -35.00 <sup>c</sup> | 18.27 <sup>c</sup><br>0.44 <sup>d</sup> | 0.002<br>0.110(ns)       | Figure 7F<br>Figure 7F |
| Control (RNAi)        | N2; <i>hif-1</i> (110)  | 15.59 | +19.28 <sup>c</sup> | 22 | 0 <sup>c</sup>      | 95.16 <sup>c</sup>                      | <0.0001                  | Figure 7B              |
|                       | N2; <i>hif-1</i> (110)  | 18.20 | +27.45 <sup>c</sup> | 22 | +10.00 <sup>c</sup> | 98.23 <sup>c</sup>                      | <0.0001                  | Figure 7B              |
|                       | N2; <i>hif-1</i> (110)  | 17.34 | +21.43 <sup>c</sup> | 20 | 0 <sup>c</sup>      | 89.60 <sup>c</sup>                      | <0.0001                  | Figure 7B              |
| 100 mM glucose (RNAi) | N2; <i>hif-1</i> (110)  | 14.96 | +14.46 <sup>c</sup> | 22 | 0 <sup>c</sup>      | 4.6 <sup>c</sup><br>0.79 <sup>d</sup>   | 0.065 (ns)<br>0.987 (ns) | Figure 7B              |
|                       | N2; <i>hif-1</i> (110)  | 16.2  | +13.45 <sup>c</sup> | 21 | +5.00 <sup>c</sup>  | 6.41 <sup>c</sup><br>0.620 <sup>d</sup> | 0.045<br>0.746 (ns)      | Figure 7B<br>Figure 7B |
|                       | N2; <i>hif-1</i> (110)  | 15.87 | +11.13 <sup>c</sup> | 20 | 0 <sup>c</sup>      | 5.98 <sup>c</sup><br>0.521 <sup>d</sup> | 0.050<br>0.601 (ns)      | Figure 7B<br>Figure 7B |
|                       | N2; <i>hif-1</i> (110)  | 15.87 | +11.13 <sup>c</sup> | 20 | 0 <sup>c</sup>      | 5.98 <sup>c</sup><br>0.521 <sup>d</sup> | 0.050<br>0.601 (ns)      | Figure 7B<br>Figure 7B |
| Control (RNAi)        | N2; <i>crh-1</i> (110)  | 19.14 | +46.44 <sup>c</sup> | 28 | +27.27 <sup>c</sup> | 40.62 <sup>c</sup>                      | <0.0001                  | Figure 7C              |
|                       | N2; <i>crh-1</i> (110)  | 20.5  | +43.56 <sup>c</sup> | 29 | +45.00 <sup>c</sup> | 63.85 <sup>c</sup>                      | <0.0001                  | Figure 7C              |
|                       | N2; <i>crh-1</i> (110)  | 21.2  | +48.46 <sup>c</sup> | 27 | +35.00 <sup>c</sup> | 52.14 <sup>c</sup>                      | <0.0001                  | Figure 7C              |
| 100 mM glucose (RNAi) | N2; <i>crh-1</i> (110)  | 17.77 | +35.96 <sup>c</sup> | 26 | +18.18 <sup>c</sup> | 21.58 <sup>c</sup><br>3.8 <sup>d</sup>  | <0.0001<br>0.512 (ns)    | Figure 7C              |
|                       | N2; <i>crh-1</i> (110)  | 19.33 | +35.36 <sup>c</sup> | 24 | +20.00 <sup>c</sup> | 19.76 <sup>c</sup><br>3.22 <sup>d</sup> | <0.0001<br>0.443 (ns)    | Figure 7C<br>Figure 7C |
|                       | N2; <i>crh-1</i> (110)  | 18.27 | +27.94 <sup>c</sup> | 25 | +25.00 <sup>c</sup> | 26.44 <sup>c</sup><br>2.61 <sup>d</sup> | <0.0001<br>0.347 (ns)    | Figure 7C<br>Figure 7C |
|                       | N2; <i>crh-1</i> (110)  | 18.27 | +27.94 <sup>c</sup> | 25 | +25.00 <sup>c</sup> | 26.44 <sup>c</sup><br>2.61 <sup>d</sup> | <0.0001<br>0.347 (ns)    | Figure 7C<br>Figure 7C |

<sup>Δ</sup>: Throughout S2 Table, % change in lifespan and *P* values were calculated against the control condition. Increase (+) or decrease (-) in lifespan was indicated. (n) : number of worms, (ns) : not statistically significant,  $\chi^2$  : chi-squared.

<sup>a</sup> compared to wild-type animals in the control condition.

<sup>b</sup> compared to the same strain in the control condition against the HG condition.

<sup>c</sup> compared to N2 with empty vector pL4440 in the control condition.

<sup>d</sup> compared to the same RNAi in the control condition against the HG condition.
